# Supplementary material
Source: bioRxiv or medRxiv preprint supplement (https://www.medrxiv.org/highwire/filestream/69836/field_highwire_adjunct_files/0/19010520-1.pdf)
Supplement: Supplementary file [file 19010520-1.pdf]

# **Optimal Pharmacological Management and Prevention of Glucocorticoid-Induced Osteoporosis (GIOP)**

**Protocol for a Systematic Review and Network Meta-Analysis**

**Supplementary Materials:** Sample Search Strategy

## Supplementary 1: MEDLINE Search Strategy

| Database: OVID Medline Epub Ahead of Print, In-Process & Other Non-Indexed Citations, Ovid MEDLINE(R) Daily and Ovid MEDLINE(R) 1946 to Present |                                                                                                                                                                               |
|-------------------------------------------------------------------------------------------------------------------------------------------------|-------------------------------------------------------------------------------------------------------------------------------------------------------------------------------|
| Line                                                                                                                                            |                                                                                                                                                                               |
| 1                                                                                                                                               | exp Osteoporosis/                                                                                                                                                             |
| 2                                                                                                                                               | osteoporos?s.ti,ab,kf.                                                                                                                                                        |
| 3                                                                                                                                               | Bone Diseases, Metabolic/                                                                                                                                                     |
| 4                                                                                                                                               | osteop?eni*.ti,ab,kf.                                                                                                                                                         |
| 5                                                                                                                                               | Bone Diseases/                                                                                                                                                                |
| 6                                                                                                                                               | exp Bone Resorption/                                                                                                                                                          |
| 7                                                                                                                                               | malabsorption.ti,ab,kf.                                                                                                                                                       |
| 8                                                                                                                                               | Bone Density/                                                                                                                                                                 |
| 9                                                                                                                                               | BMD.ti,ab,kf.                                                                                                                                                                 |
| 10                                                                                                                                              | exp Fractures, Bone/                                                                                                                                                          |
| 11                                                                                                                                              | fracture*.ti,ab,kf.                                                                                                                                                           |
| 12                                                                                                                                              | (bone* adj2 (loss* or disease* or resorption* or densit* or content* or fragil* or mass* or demineral* or decalcif* or calcif* or strength*)).ti,ab,kf.                       |
| 13                                                                                                                                              | osteomalacia.ti,ab,kf.                                                                                                                                                        |
| 14                                                                                                                                              | or/1-13                                                                                                                                                                       |
| 15                                                                                                                                              | exp Glucocorticoids/                                                                                                                                                          |
| 16                                                                                                                                              | exp Steroids/                                                                                                                                                                 |
| 17                                                                                                                                              | (glucocorticoid* or steroid* or prednisone or prednisolone or hydrocortisone or cortisone or triamcinolone or dexamethasone or betamethasone or methylprednisolone).ti,ab,kf. |
| 18                                                                                                                                              | or/15-17                                                                                                                                                                      |
| 19                                                                                                                                              | 14 and 18                                                                                                                                                                     |
| 20                                                                                                                                              | ((glucocorticoid-induced or glucosteroid-induced or corticosteroid-induced or glucocorticosteroid-induced) adj1 osteoporos?s).ti,ab,kf.                                       |
| 21                                                                                                                                              | 19 or 20                                                                                                                                                                      |
| 22                                                                                                                                              | exp Diphosphonates/                                                                                                                                                           |
| 23                                                                                                                                              | (bisphosphon* or diphosphon*).ti,ab,kf.                                                                                                                                       |

|    |                                                                                                                                                                                                                                                                                                                              |
|----|------------------------------------------------------------------------------------------------------------------------------------------------------------------------------------------------------------------------------------------------------------------------------------------------------------------------------|
| 24 | exp organophosphates/ or organophosphonates/                                                                                                                                                                                                                                                                                 |
| 25 | (organophosphate* or organophosphonate*).ti,ab,kf.                                                                                                                                                                                                                                                                           |
| 26 | (alendronate or alendronic acid or Fosamax or Binosto or Denfos or Fosagen or Lendrate).ti,ab,kf.                                                                                                                                                                                                                            |
| 27 | (Densidron or Adrovanse or Alenotop or Alned or Dronat or Durost or Fixopan or Forosa or Fosval or Huesobone or Ostemax or Oseolen or Arendal or Beenos or Berlex or Fosalen or Fosmin or Fostolin or Fosavance).ti,ab,kf.                                                                                                   |
| 28 | (clodronic acid or etidronic acid or ibandronic acid or pamidronate or risedronic acid or zoledronic acid).ti,ab,kf.                                                                                                                                                                                                         |
| 29 | (etidronate or Didrocal or Didronel or Etidrocal or etidronatecal or Etidron or hydroxyethanediphosphonic acid or oxyethylidenediphosphonic acid).ti,ab,kf.                                                                                                                                                                  |
| 30 | (risedronate or Actonel or Atelvia or Benet or Ridron).ti,ab,kf.                                                                                                                                                                                                                                                             |
| 31 | (zoledronate or Aclasta or Reclast or Zometa).ti,ab,kf.                                                                                                                                                                                                                                                                      |
| 32 | (ibandronate or Bondronat or Boniva or Bonviva or lasibon or Adronil).ti,ab,kf.                                                                                                                                                                                                                                              |
| 33 | (tiludronate or tiludronic acid or Skelid).ti,ab,kf.                                                                                                                                                                                                                                                                         |
| 34 | (pamidronate or Aredia or Aminomux or Pamimed or Ribodroat or Bonin).ti,ab,kf.                                                                                                                                                                                                                                               |
| 35 | (clodronate or Bonefos or Clasteon or Ostac Cap or Lodronat or Loron or Lytos or Ostac or Sindronat).ti,ab,kf.                                                                                                                                                                                                               |
| 36 | exp Bone Density Conservation Agents/                                                                                                                                                                                                                                                                                        |
| 37 | (bone modifying agent* or bone density conservation agent*).ti,ab,kf.                                                                                                                                                                                                                                                        |
| 38 | (RANKL Inhibitor or denosumab).ti,ab,kf.                                                                                                                                                                                                                                                                                     |
| 39 | hormones/ or exp estrogens/                                                                                                                                                                                                                                                                                                  |
| 40 | (estrogen or estradiol or estrace or innofem or vagifem or minivelle or yuvafem or premarin or progesterone or estradiol or vivelle or menostar or climara or alora or estraderm or oestradiol or estropipate or ogen or ethinylestradiol or Prempro or prempase or bazedoxifene or duavee or medroxyprogesterone).ti,ab,kf. |
| 41 | (phytoestrogen* or Coumestrol or Isoflavone or Isoflavon).ti,ab,kf.                                                                                                                                                                                                                                                          |
| 42 | (calcitonin or miacalcin or calcimar or cibacalcin or Fortical or thyrocalcitonin or Calcitare).ti,ab,kf.                                                                                                                                                                                                                    |
| 43 | (SERM* or raloxifene or Evista or Optruma or Keoxifene).ti,ab,kf.                                                                                                                                                                                                                                                            |
| 44 | exp Parathyroid Hormone/                                                                                                                                                                                                                                                                                                     |
| 45 | (parathyroid hormone* or parathormone* or teriparatide* or Forteo or Forsteo).ti,ab,kf.                                                                                                                                                                                                                                      |
| 46 | Parathyroid Hormone-Related Protein/                                                                                                                                                                                                                                                                                         |

|    |                                                                                                                                                                                                                   |
|----|-------------------------------------------------------------------------------------------------------------------------------------------------------------------------------------------------------------------|
| 47 | exp Anabolic Agents/                                                                                                                                                                                              |
| 48 | (abaloparatide or anabolic agent* or Tymlos).ti,ab,kf.                                                                                                                                                            |
| 49 | (Sclerostin Inhibitor* or romosozumab or strontium ranelate or ranelic acid or Evenity or Osseor or Protelos).ti,ab,kf.                                                                                           |
| 50 | (calcium or vitamin D or nutraceutical or caltrate or ridactate or Calciferol or citracal or posture or Ostoforte or calcitrate or antacids or Cal-Lac or Radiostol or cholecalciferol or alfacalcidol).ti,ab,kf. |
| 51 | or/22-50                                                                                                                                                                                                          |
| 52 | 21 and 51                                                                                                                                                                                                         |
| 53 | exp randomized controlled trial/                                                                                                                                                                                  |
| 54 | exp Randomized Controlled Trials as Topic/                                                                                                                                                                        |
| 55 | randomized controlled trial.pt.                                                                                                                                                                                   |
| 56 | random*.mp.                                                                                                                                                                                                       |
| 57 | double-blind method/ or single-blind method/                                                                                                                                                                      |
| 58 | ((singl* or doubl* or tripl* or trebl*) adj3 (blind* or mask* or procedure* or method*)).mp.                                                                                                                      |
| 59 | systematic review*.mp.                                                                                                                                                                                            |
| 60 | systematic review.pt.                                                                                                                                                                                             |
| 61 | meta analys?s.mp.                                                                                                                                                                                                 |
| 62 | meta-analysis/ or "systematic review"/                                                                                                                                                                            |
| 63 | or/53-62                                                                                                                                                                                                          |
| 64 | 52 and 63                                                                                                                                                                                                         |
| 65 | animals/ not (humans/ and animals/)                                                                                                                                                                               |
| 66 | 64 not 65                                                                                                                                                                                                         |

## Supplementary 2: CNKI Search Strategy

\* “+” is equivalent to “OR”, “\*” is equivalent to “AND”, “-” is equivalent to “NOT”

((bisphosphonate'+diphosphonates'+双磷酸盐'+二磷酸盐'+二膦酸盐'+双磷酸盐'+alendronate'+alendronic acid'+Fosamax'+阿伦膦酸'+阿屈膦酸'+阿仑膦酸'+阿仑特罗'+阿伦膦酸'+阿屈膦酸'+阿仑膦酸'+阿仑特罗'+阿仑棒酸'+阿伦棒酸'+福善美'+固邦'+天可'+etidronate'+etidronic acid'+EHDP'+依替膦酸'+依替膦酸'+羟乙膦酸'+羟乙膦酸'+邦特林'+依膦'+正大天晴'+根德)\*(risedronate'+risedronic acid'+利塞膦酸'+利塞膦酸'+积华固松'+利噻膦酸'+利噻膦酸'+吉威'+唯善'zoledronate'+zoledronic acid'+Aclasta'+Zometa'+唑来膦酸'+唑来膦酸'+天晴依泰'+择泰'+艾瑞宁'+健润'+震达'+盖柠'+卓莱'+盖柠'+艾朗'+因力达'+佐锐'+苏奇'+博来宁'+密固达'+ibandronate'+ibandronic acid'+伊班膦酸'+伊班膦酸'+艾本'+邦罗力'+佳诺顺)\*(tiludronate'+tiludronic acid'+Skelid'+替鲁膦酸'+替鲁膦酸'+替鲁罗酸'+替卤屈酸'+pamidronate'+pamidronic acid'+Aredia'+Bonin'+帕米膦酸'+帕米膦酸'+博宁'+仁怡'+阿可达'+clodronate'+clodronic acid'+Bonefos'+氯膦酸钠'+氯膦酸钠'+氯屈膦酸'+氯屈膦酸'+德维'+迪盖纳'+雅坤宇'+固令'+minodronate'+minodronic acid'+米诺膦酸'+米诺膦酸)\*(RANKL Inhibitor'+靶向NF-κB受体活化因子配体'+全人源抗体'+RANKL 抗体'+denosumab'+Prolia'+AMG-162'+Xgeva'+Ranmark'+地诺单抗'+狄诺塞麦'+Hormone'+steroid'+激素'+荷尔蒙'+estrogen'+雌激素'+倍美力)\*(calcitonin'+salmon calcitonin'+miacalcin'+降钙素'+鲑降钙素'+邦瑞得'+固泰宁'+eel calcitonin'+porcine calcitonin'+盖瑞宁'+翰欣'+达芬盖'+考克'+密盖息'+Selective Estrogen Receptor Modulators'+SERM'+选择性雌激素受体调节剂)\*(raloxifene'+Evista'+Optruma'+Keoxifene'+雷洛昔芬'+盐酸雷洛昔芬'+易维特'+Parathyroid'+Hormone'+parathormone'+PTH'+甲状旁腺激素'+teriparatide'+Forteo'+Forsteo'+特立帕肽'+复泰奥)\*(PTHrp'+甲状旁腺激素相关蛋白类似物'+abaloparatide'+Tymlos'+阿巴帕肽'+Sclerostin Inhibitor'+sclerostin antibody'+硬化素抑制剂'+硬化素抗体'+romosozumab'+AMG-785'+Evenity'+罗莫索单抗)\*(strontium ranelate'+ranelic acid'+Osseor'+Protelos'+ '+雷奈酸锶'+欧思美'+Supplement'+calcium'+钙'+葡萄糖酸钙'+vitamin D'+Calciferol'+cholecalciferol'+alfacalcidol'+阿法骨化醇'+胆维丁'+维生素 D))\*(glucocorticoid'+glucosteroid'+corticosteroid'+steroid'+glucocorticosteroid'+糖皮质'+糖皮质素'+糖皮质激素'+激素'+prednisone'+肾上腺'+肾上腺

素'+ '肾上腺激素'+ '强的松'+ '泼尼松'+ 'prednisolone'+ '泼尼松  
龙'+ 'hydrocortisone'+ '氢化可的松'+ 'cortisone'+ 'bethamethasone'+ '倍他米  
松'+ 'triamcinolone'+ '曲安奈德'+ 'dexamethasone'+ '地塞米松'+ '氟美松'+ '地噻米  
松'+ '类固醇'+ 'betamethasone'+ '倍他米松'+ 'methylprednisolone'+ '甲泼尼龙'+ '甲  
基泼尼松龙'+ '甲基强的松龙'+ '甲泼尼松龙'+ '甲强龙')\*( 'glucocorticoid-  
induced'+ 'glucosteroid-induced'+ 'corticosteroid-induced'+ 'steroid-  
induced'+ 'glucocorticosteroid-induced'+ '糖皮质激素性骨质疏松'+ '糖皮质激素性  
骨质疏松'+ 'GIOP'+ '糖皮质激素诱导骨质疏松'+ '糖皮质激素引发的骨质疏  
松'+ 'osteoporosis'+ '骨质疏松'+ 'fracture'+ 'Autoimmune disease'+ 'bone loss'+ '自  
身免疫性疾病'+ '红斑狼疮'+ '哮喘')\*( 'randomized controlled trial'+ 'RCT'+ '随  
机'+ 'randomize'+ 'randomized'+ 'inferiority'+ '双盲'+ 'control'+ 'controlled'+ '单  
盲'+ 'trial'+ 'clinical trial'+ 'placebo'+ '开放'+ 'dummy'+ 'blind'+ 'placebo-  
controlled'+ 'prospective'+ 'crossover'+ 'non-inferiority'+ 'open-label'+ 'double-  
blind'+ 'triple-blind'+ 'double-dummy')-( '动物'- 'animal'- '鼠'- '兔'- '狗'- '羊')
